# Supplementary material
Source: publisher figshare collection journal article supplement (https://karger.figshare.com/ndownloader/files/28959543)
Supplement: Supplementary file 1 [file 28959543]

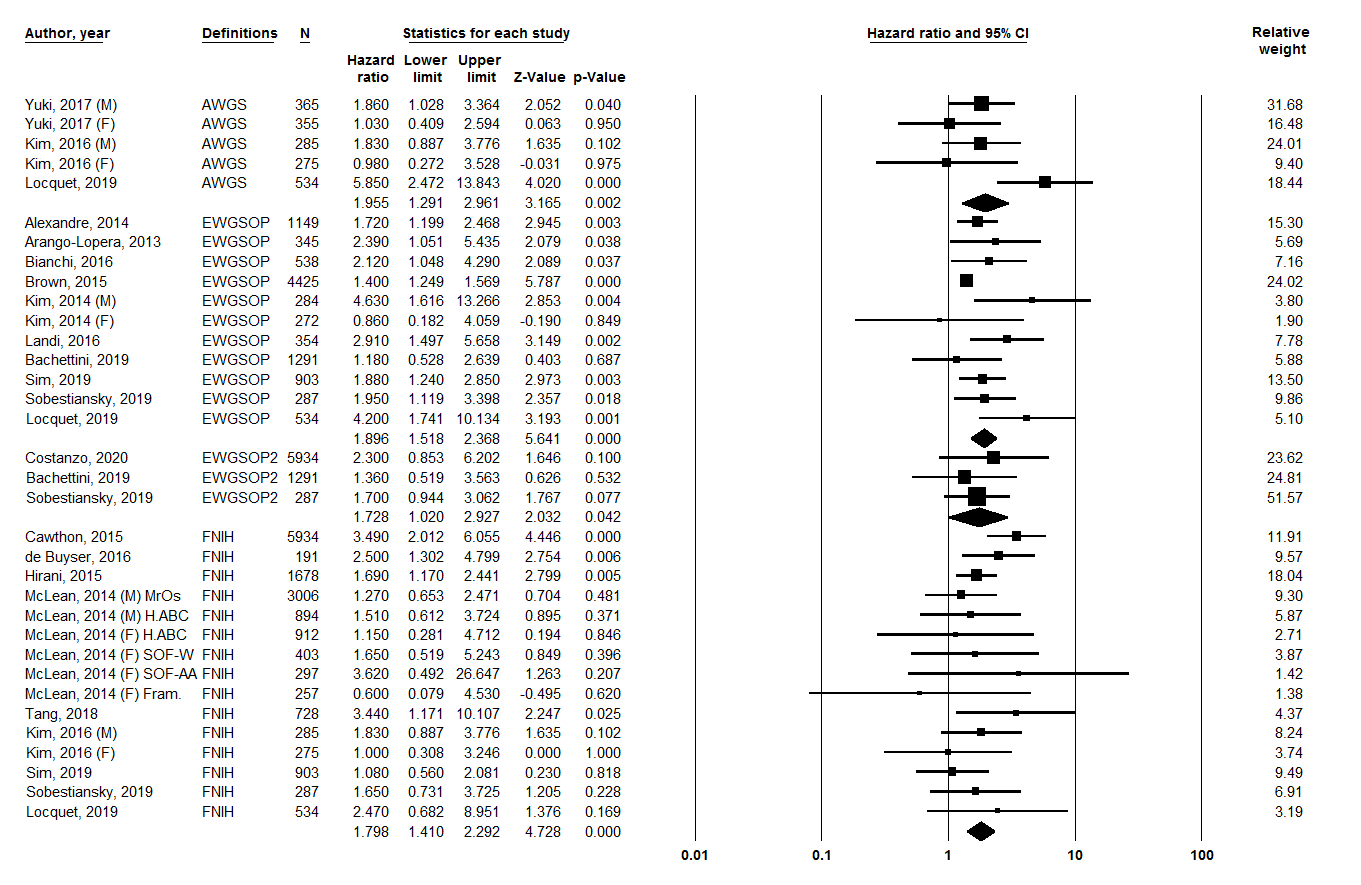
**Supplementary Figure 1.** Meta-analysis of the association between sarcopenia and mortality in community-dwelling adults presented in hazard ratios, stratified by definition

Heterogeneity (I2): AWGS (56.7%), EWGSOP (50.4%), EWGSOP2 (0%), FNIH (5.4%). AWGS: Asian Working Group for Sarcopenia, EWGSOP: European Working Group on Sarcopenia in Older People 2010, EWGSOP2: European Working Group on Sarcopenia in Older people 2018, FNIH: Foundation for the National Institutes of Health, M: males, F: females, MrOs: Men Study Sleep Study Ancillary Study, H.ABC: Health Aging and Body Composition Study, SOF-W: Study of Osteoporotic Fractures Original, SOF-AA: Study of Osteoporotic Fractures African American cohorts, Fram.: Framingham Study Offspring cohort
